# Supplementary material
Source: MDPI journal article supplement (https://www.mdpi.com/2073-4441/12/12/3538)
Supplement: s1 [file s1]

Supplementary Information

# Hydrodynamic and Waves Response During Storm Surges on The Southern Brazilian Coast: a Hindcast Study

Andre de Souza de Lima <sup>1,\*</sup>, Arslaan Khalid <sup>2</sup>, Tyler Will Miesse <sup>2</sup>, Felicio Cassalho <sup>2</sup>, Celso Ferreira <sup>2</sup>, Marinez Eymael Garcia Scherer <sup>1</sup>, Jarbas Bonetti <sup>1</sup>

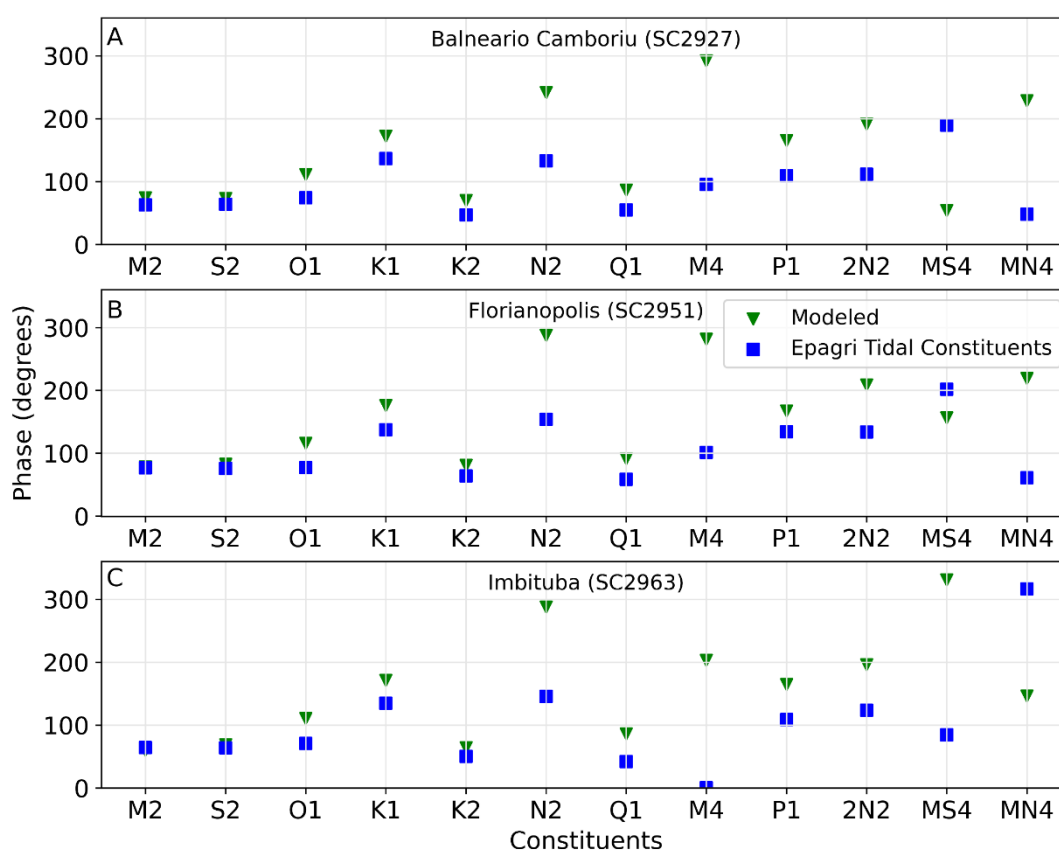

**Figure S1.** (A-C) Harmonic Constituent Phases for three different stations in the Santa Catarina State coastal areas.
